# Supplementary material for: Na3PO4-catalyzed aminochlorination reaction of β-nitrostyrenes in water
Source: Royal Society of Chemistry journal article supplement (doi:10.1039/c1ra00679g), 2011-10-27

## Supporting Information

# **Na<sub>3</sub>PO<sub>4</sub>-catalyzed aminochlorination reaction of β-nitrostyrenes in water**

**Haibo Mei,<sup>a</sup> Yiwen Xiong,<sup>a</sup> Yu Qian,<sup>a</sup> Jianlin Han,<sup>\*a</sup> Guigen Li<sup>b</sup> and Yi Pan<sup>\*a</sup>**

<sup>a</sup> School of Chemistry and Chemical Engineering, Nanjing University; State of Key Laboratory of Coordination, Nanjing University, Nanjing, 210093, China.

<sup>b</sup> Department of Chemistry and Biochemistry, Texas Tech University, Lubbock, Texas 79409-106, USA

E-mail: hanjl@nju.edu.cn, yipan@nju.edu.cn

## Table of Contents

|                                                                                  | <b>Page</b> |
|----------------------------------------------------------------------------------|-------------|
| <b>1. General information -----</b>                                              | <b>2</b>    |
| <b>2. Aminochlorination of β-nitrostyrenes with BocNCl<sub>2</sub> -----</b>     | <b>2</b>    |
| <b>3. Aminochlorination of β-nitrostyrene with BocNH<sub>2</sub> and NCS ---</b> | <b>7</b>    |
| <b>4. <sup>1</sup>H and <sup>13</sup>C NMR spectra for compound 3 -----</b>      | <b>8</b>    |

## 1. General information

All aminohalogenation reactions were performed in vials at room temperature without protection of inert gases. BocNCl<sub>2</sub><sup>1</sup> was prepared according to the reported methods. The other chemicals were used as obtained from commercial sources without further purification. Flash chromatography was performed using silica gel 60 (200-300 mesh). Thin layer chromatography was carried out on silica gel 60 F-254 TLC plates of 20 cm × 20 cm. Melting points are uncorrected. IR spectra were collected on Bruker Vector 22 in KBr pellets. <sup>1</sup>H and <sup>13</sup>C NMR (TMS used as internal standard) spectra were recorded with a Bruker ARX 300 spectrometer. High resolution mass spectra for all the new compounds were done by Micromass Q-ToF instrument (ESI).

## 2. Aminochlorination of β-nitrostyrenes with BocNCl<sub>2</sub>

Into a reaction vial were taken β-nitrostyrenes (0.5 mmol), Na<sub>3</sub>PO<sub>4</sub>·12H<sub>2</sub>O (0.1 mmol), BocNCl<sub>2</sub> (1.25 mmol), MeCN (1.6 mL) and H<sub>2</sub>O (3.2 mL). The reaction mixture was stirred at room temperature for 12 min, and then the reaction was quenched with saturated Na<sub>2</sub>SO<sub>3</sub> (3.0 mL). The organic layer was taken and the aqueous layer was extracted with EtOAc (2 × 20 mL). The combined organic layers were dried with anhydrous Na<sub>2</sub>SO<sub>4</sub>, filtered and the solvent was removed to give the crude product, which was purified by TLC plate (hexane/EtOAc, 8:1).

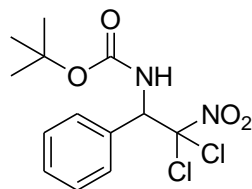

*Tert*-butyl 2,2-dichloro-2-nitro-1-phenylethylcarbamate (**3a**): white solid, yield 88%, mp 105-106 °C. <sup>1</sup>H NMR (CDCl<sub>3</sub>, 300 MHz): δ = 7.42 (s, 5 H), 5.99 (d, *J* = 10.5 Hz, 1 H), 5.56 (d, *J* = 10.5 Hz, 1 H), 1.45 (s, 9 H).

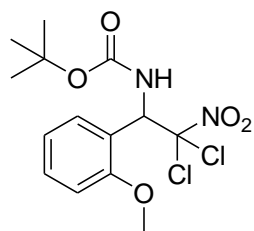

*Tert*-butyl 2,2-dichloro-1-(2-methoxyphenyl)-2-nitroethylcarbamate (**3b**): white solid, yield 97%, mp 152-154 °C.  $^1\text{H}$  NMR ( $\text{CDCl}_3$ , 300 MHz):  $\delta$  = 7.33-7.42 (m, 2 H), 6.94-7.03 (m, 2 H), 6.28 (d,  $J$  = 10.5 Hz, 1 H), 6.08 (d,  $J$  = 9.6 Hz, 1 H), 3.88 (s, 3 H), 1.46 (s, 9 H).  $^{13}\text{C}$  NMR ( $\text{CDCl}_3$ , 75 MHz):  $\delta$  = 157.7, 154.3, 130.9, 130.6, 120.8, 116.5, 112.8, 111.6, 81.0, 61.0, 55.6, 28.2. IR (KBr):  $\nu$  = 3253, 3142, 2978, 1697, 1585, 1365, 1249, 1160, 756  $\text{cm}^{-1}$ . HRMS [ $\text{M}+\text{Na}^+$ ]: calcd for  $\text{C}_{14}\text{H}_{18}\text{N}_2\text{O}_5\text{Cl}_2\text{Na}$ : 387.0485, found: 387.0490.

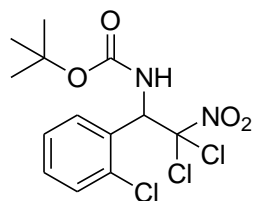

*Tert*-butyl 2,2-dichloro-1-(2-chlorophenyl)-2-nitroethylcarbamate (**3c**): white solid, yield 98%, mp 168-170 °C.  $^1\text{H}$  NMR ( $\text{CDCl}_3$ , 300 MHz):  $\delta$  = 7.48-7.51 (m, 2 H), 7.33-7.40 (m, 2 H), 6.75 (d,  $J$  = 10.2 Hz, 1 H), 5.58 (d,  $J$  = 10.2 Hz, 1 H), 1.44 (s, 9 H).

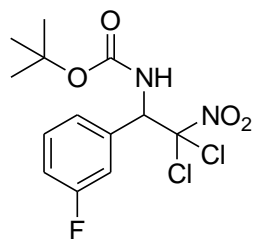

*Tert*-butyl 2,2-dichloro-1-(3-fluorophenyl)-2-nitroethylcarbamate (**3d**): white solid, yield 87%, mp 115-117 °C.  $^1\text{H}$  NMR ( $\text{CDCl}_3$ , 300 MHz):  $\delta$  = 7.35-7.43 (m, 1 H), 7.10-7.24 (m, 3 H), 5.99 (d,  $J$  = 8.7 Hz, 1 H), 5.55 (s, 1 H), 1.45 (s, 9 H).

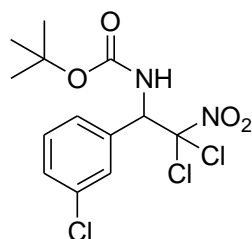

*Tert*-butyl 2,2-dichloro-1-(3-chlorophenyl)-2-nitroethylcarbamate (**3e**): white solid, yield 73%, mp 136-138 °C.  $^1\text{H}$  NMR ( $\text{CDCl}_3$ , 300 MHz):  $\delta$  = 7.33-7.45 (m, 4 H), 5.97 (d,  $J$  = 9.3 Hz, 1 H), 5.58 (s, 1H), 1.45 (s, 9 H).

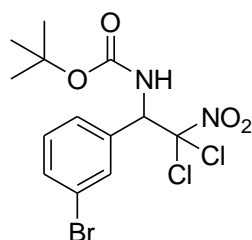

*Tert*-butyl 1-(3-bromophenyl)-2,2-dichloro-2-nitroethylcarbamate (**3f**): white solid, yield 86%, mp 152-154 °C.  $^1\text{H}$  NMR ( $\text{CDCl}_3$ , 300 MHz):  $\delta$  = 7.55-7.60 (m, 2 H), 7.39 (d,  $J$  = 7.2 Hz, 1 H), 7.31 (d,  $J$  = 7.8 Hz, 1 H), 5.96 (d,  $J$  = 9.0 Hz, 1 H), 5.57 (d,  $J$  = 8.7 Hz, 1 H), 1.45 (s, 9 H).

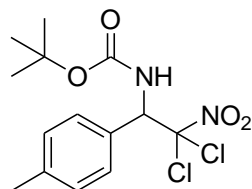

*Tert*-butyl 2,2-dichloro-2-nitro-1-p-tolyethylcarbamate (**3g**): white solid, yield 83%, mp 108-110 °C.  $^1\text{H}$  NMR ( $\text{CDCl}_3$ , 300 MHz):  $\delta$  = 7.32 (d,  $J$  = 7.8 Hz, 2 H), 7.23 (d,  $J$  = 8.4 Hz, 2 H), 5.95 (d,  $J$  = 9.9 Hz, 1 H), 5.58 (d,  $J$  = 9.0 Hz, 1 H), 2.38 (s, 3 H), 1.45 (s, 9 H).

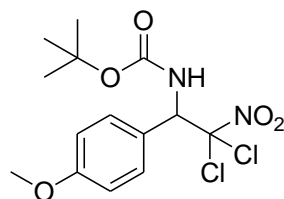

*Tert*-butyl 2,2-dichloro-1-(4-methoxyphenyl)-2-nitroethylcarbamate (**3h**): white solid,

yield 77%, mp 113-114 °C.  $^1\text{H}$  NMR ( $\text{CDCl}_3$ , 300 MHz):  $\delta$  = 7.35 (d,  $J$  = 8.7 Hz, 2 H), 6.93 (d,  $J$  = 9.0 Hz, 2 H), 5.93 (d,  $J$  = 9.3 Hz, 1 H), 5.54 (d,  $J$  = 9.9 Hz, 1 H), 3.83 (s, 3 H), 1.45 (s, 9 H).

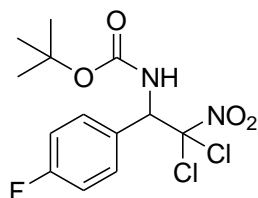

*Tert*-butyl 2,2-dichloro-1-(4-fluorophenyl)-2-nitroethylcarbamate (**3i**): white solid, yield 85%, mp 109-110 °C.  $^1\text{H}$  NMR ( $\text{CDCl}_3$ , 300 MHz):  $\delta$  = 7.40-7.44 (m, 2 H), 7.08-7.13 (m, 2 H), 5.97 (d,  $J$  = 9.6 Hz, 1 H), 5.55 (d,  $J$  = 9.9 Hz, 1 H), 1.44 (s, 9 H).

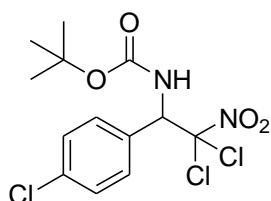

*Tert*-butyl 2,2-dichloro-1-(4-chlorophenyl)-2-nitroethylcarbamate (**3j**): white solid, yield 94%, mp 101-102 °C.  $^1\text{H}$  NMR ( $\text{CDCl}_3$ , 300 MHz):  $\delta$  = 7.38 (s, 4 H), 5.96 (d,  $J$  = 8.7 Hz, 1 H), 5.54 (s, 1 H), 1.44 (s, 9 H).

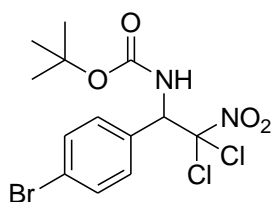

*Tert*-butyl 1-(4-bromophenyl)-2,2-dichloro-2-nitroethylcarbamate (**3k**): white solid, yield 78%, mp 106-107 °C.  $^1\text{H}$  NMR ( $\text{CDCl}_3$ , 300 MHz):  $\delta$  = 7.57 (d,  $J$  = 8.4 Hz, 2 H), 7.32 (d,  $J$  = 8.4 Hz, 2 H), 5.95 (d,  $J$  = 9.9 Hz, 1 H), 5.52 (s, 1 H), 1.44 (s, 9 H).

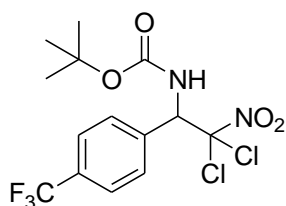

*Tert*-butyl 2,2-dichloro-2-nitro-1-(4-(trifluoromethyl)phenyl)ethylcarbamate (**3l**): white solid, yield 84%, mp 118-119 °C. <sup>1</sup>H NMR (CDCl<sub>3</sub>, 300 MHz): δ = 7.70 (d, *J* = 8.4 Hz, 2 H), 7.60 (d, *J* = 8.1 Hz, 2 H), 6.06 (d, *J* = 9.0 Hz, 1 H), 5.60 (d, *J* = 9.3 Hz, 1 H), 1.44 (s, 9 H).

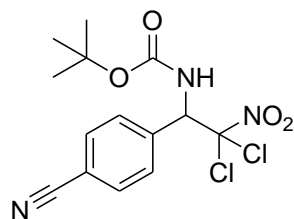

*Tert*-butyl 2,2-dichloro-1-(4-cyanophenyl)-2-nitroethylcarbamate (**3m**): white solid, yield 96%, mp 129-130 °C. <sup>1</sup>H NMR (CDCl<sub>3</sub>, 300 MHz): δ = 7.74 (d, *J* = 7.5 Hz, 2 H), 7.60 (d, *J* = 5.7 Hz, 2 H), 6.04 (d, *J* = 5.1 Hz, 1 H), 5.63 (d, *J* = 4.8 Hz, 1 H), 1.43 (s, 9 H).

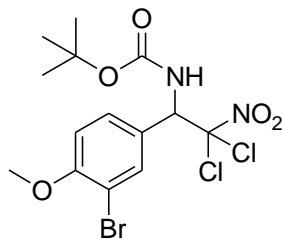

*Tert*-butyl 1-(3-bromo-4-methoxyphenyl)-2,2-dichloro-2-nitroethylcarbamate (**3n**): white solid, yield 90%, mp 169-171 °C. <sup>1</sup>H NMR (CDCl<sub>3</sub>, 300 MHz): δ = 7.62 (s, 1 H), 7.34 (d, *J* = 7.2 Hz, 1 H), 6.92 (d, *J* = 8.7 Hz, 1 H), 5.91 (d, *J* = 7.8 Hz, 1 H), 5.51 (d, *J* = 7.8 Hz, 1 H), 3.92 (s, 3 H), 1.45 (s, 9 H).

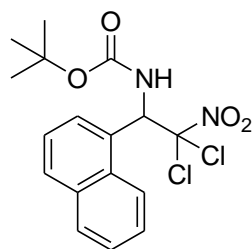

*Tert*-butyl 2,2-dichloro-1-(naphthalen-1-yl)-2-nitroethylcarbamate (**3o**): white solid, yield 61%, mp 198-199 °C. <sup>1</sup>H NMR (CDCl<sub>3</sub>, 300 MHz): δ = 8.40 (d, *J* = 6.6 Hz, 1 H),

7.97 (t,  $J = 8.4$  Hz, 2 H), 7.64-7.72 (m, 2 H), 7.52-7.60 (m, 2 H), 7.06 (d,  $J = 8.7$  Hz, 1 H), 5.70 (d,  $J = 9.0$  Hz, 1 H), 1.42 (s, 9 H).

### 3. Aminochlorination of $\beta$ -nitrostyrene with BocNH<sub>2</sub> and NCS

Into a reaction vial were taken  $\beta$ -nitrostyrenes (0.5 mmol), Na<sub>3</sub>PO<sub>4</sub>·12H<sub>2</sub>O (0.1 mmol), BocNH<sub>2</sub> (1.5 mmol), NCS (1.5 mmol), MeCN (1.6 mL) and H<sub>2</sub>O (3.2 mL). The reaction mixture was stirred at room temperature for 48 h, and then the reaction was quenched with saturated Na<sub>2</sub>SO<sub>3</sub> (3.0 mL). The organic layer was taken and the aqueous layer was extracted with EtOAc (2 × 20 mL). The combined organic layers were dried with anhydrous Na<sub>2</sub>SO<sub>4</sub>, filtered and the solvent was removed to give the crude product, which was purified by TLC plate (hexane/EtOAc, 8:1).

### Reference

- 1 R. E. White and P. Kovacic, *J. Am. Chem. Soc.*, 1975, **97**, 1180.

## 4. $^1\text{H}$ and $^{13}\text{C}$ NMR spectra for compound 3

### $^1\text{H}$ NMR of 3a

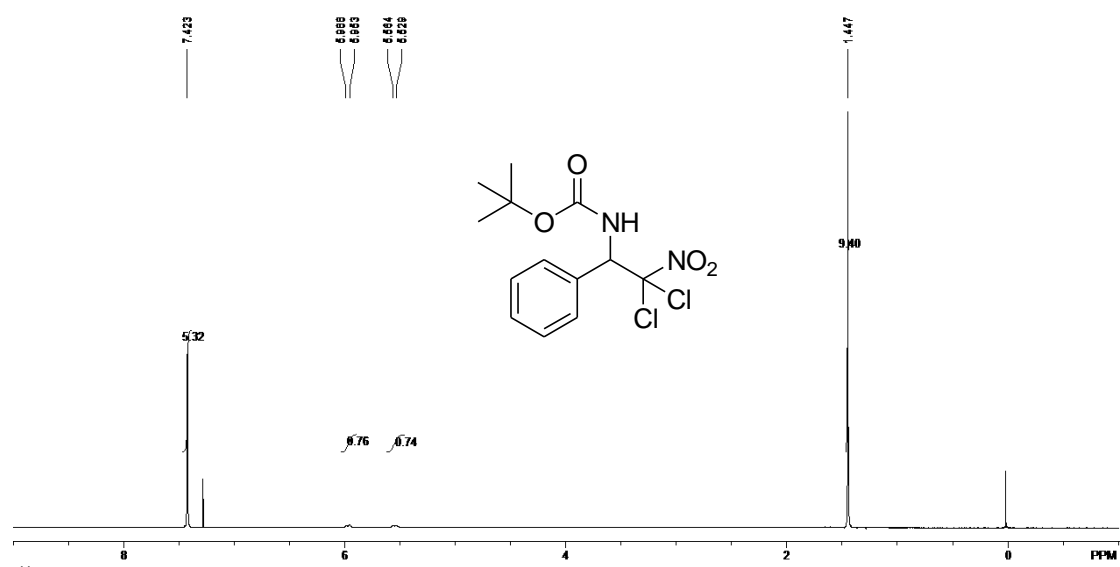



### $^1\text{H}$ NMR of **3b**

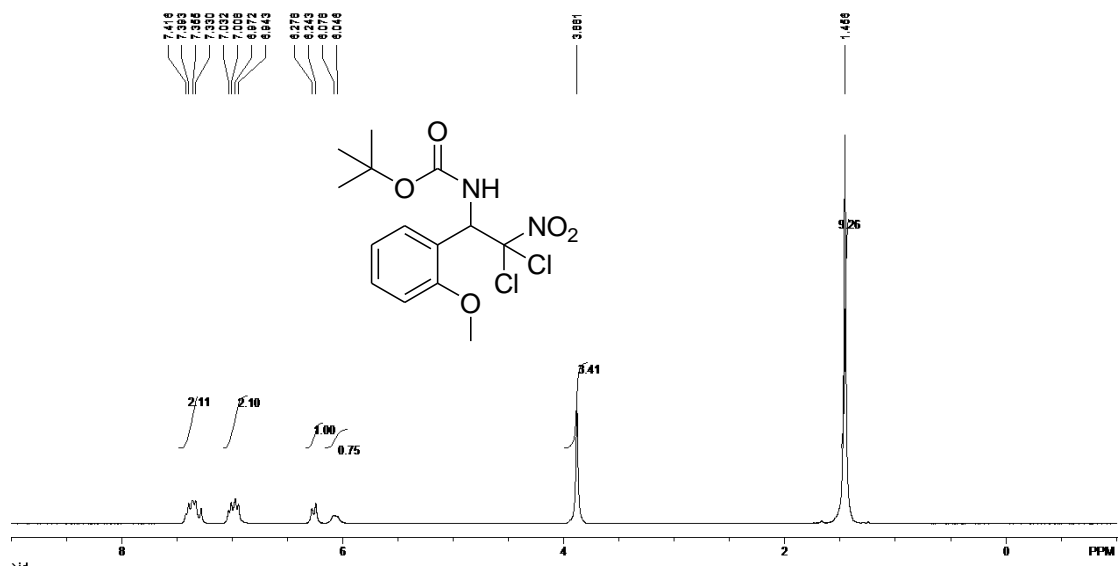

### $^{13}\text{C}$ NMR of **3b**

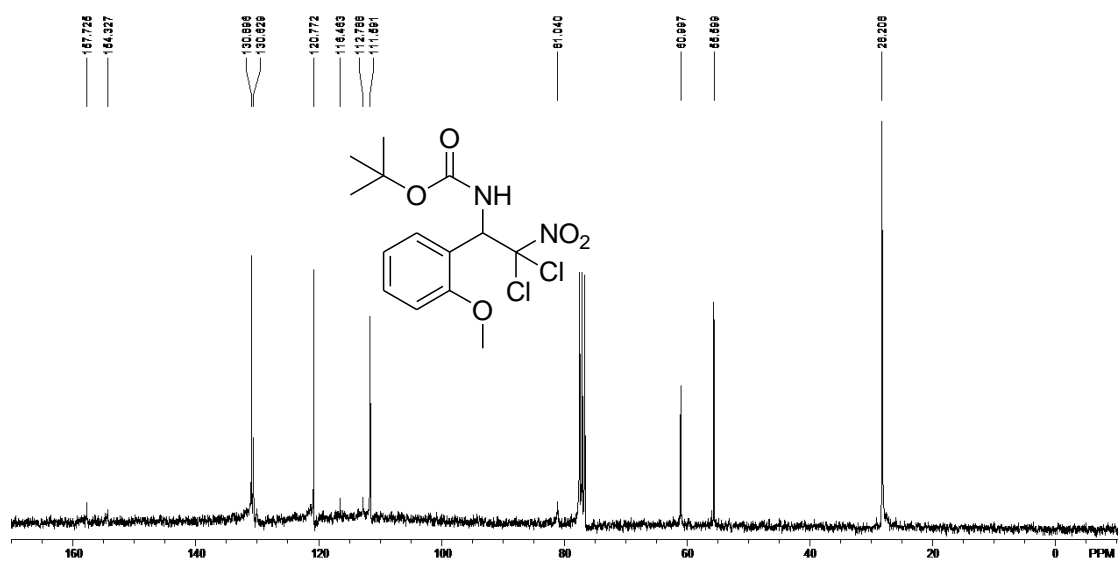

### $^1\text{H}$ NMR of **3c**

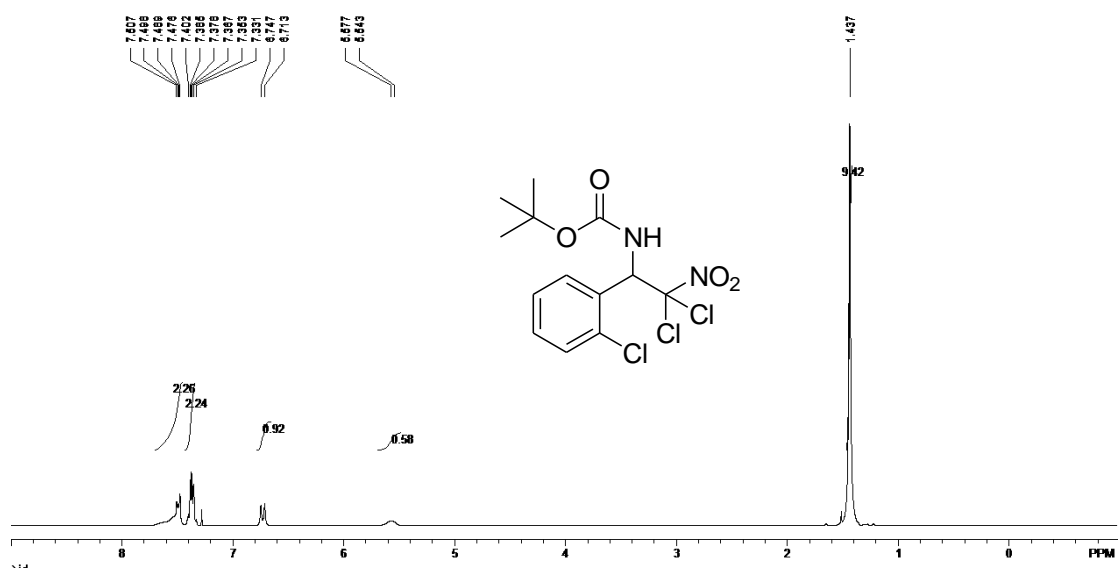

### $^1\text{H}$ NMR of **3d**

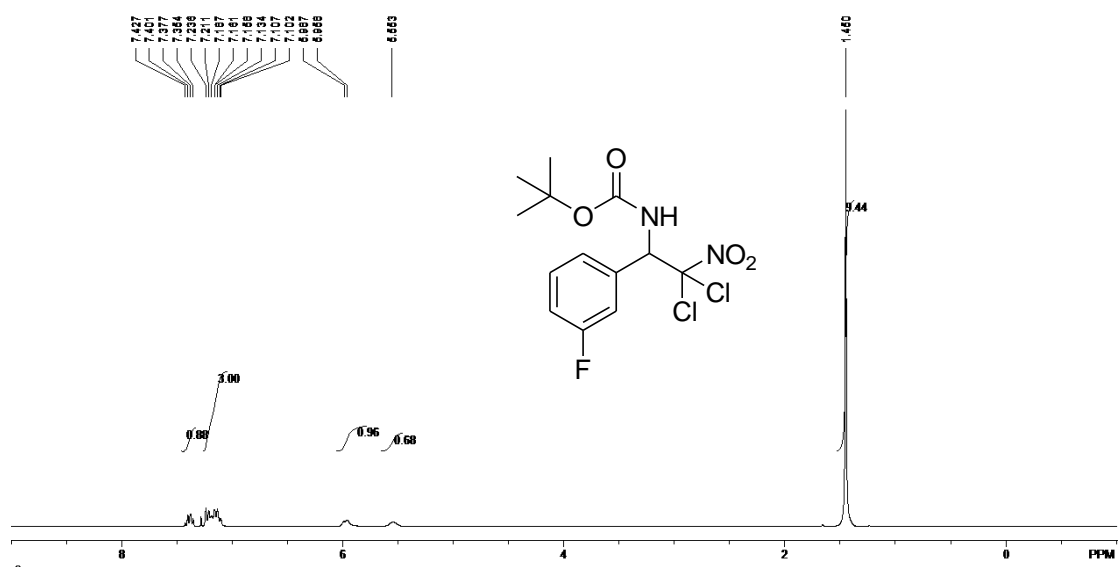

### $^1\text{H}$ NMR of **3e**

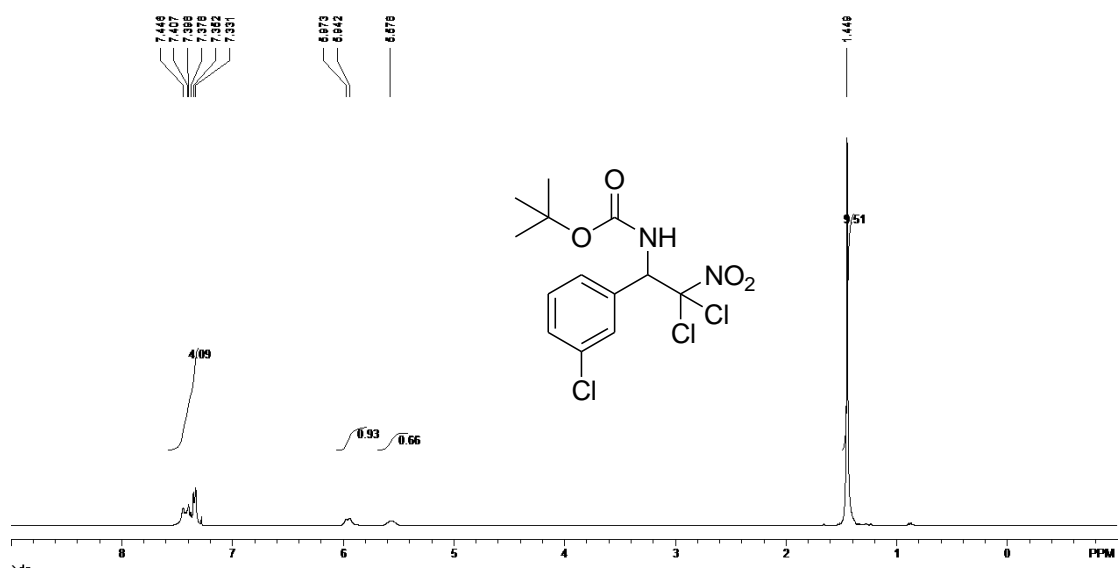

### $^1\text{H}$ NMR of **3f**

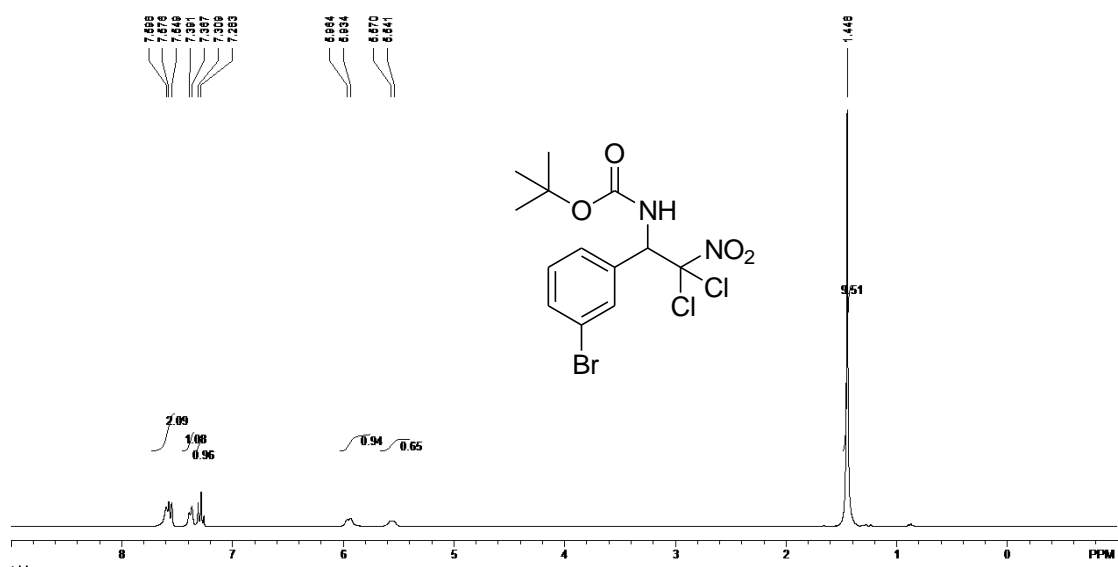

### $^1\text{H}$ NMR of **3g**

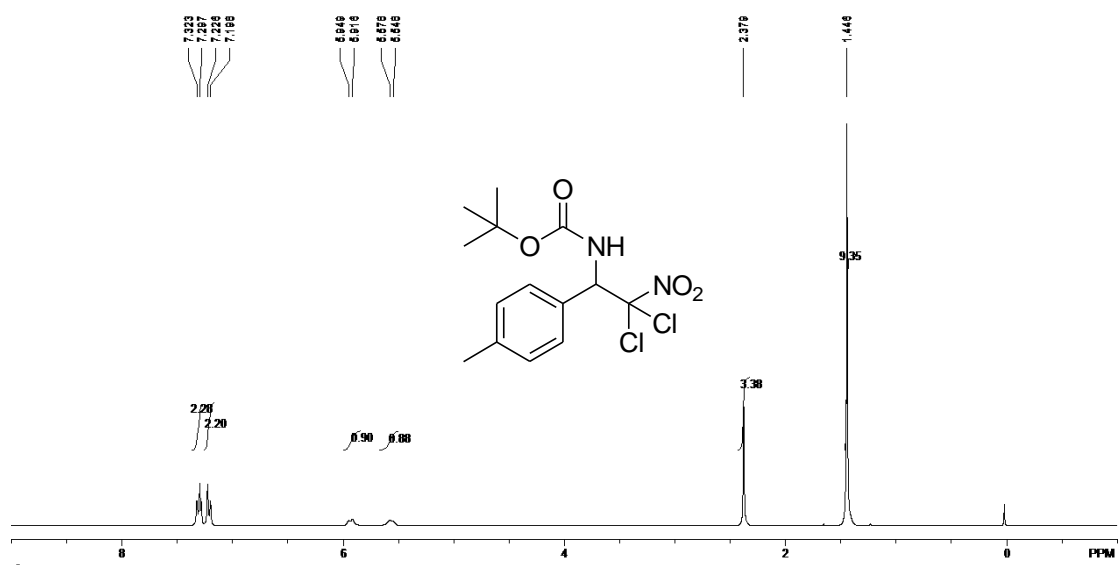

### $^1\text{H}$ NMR of **3h**

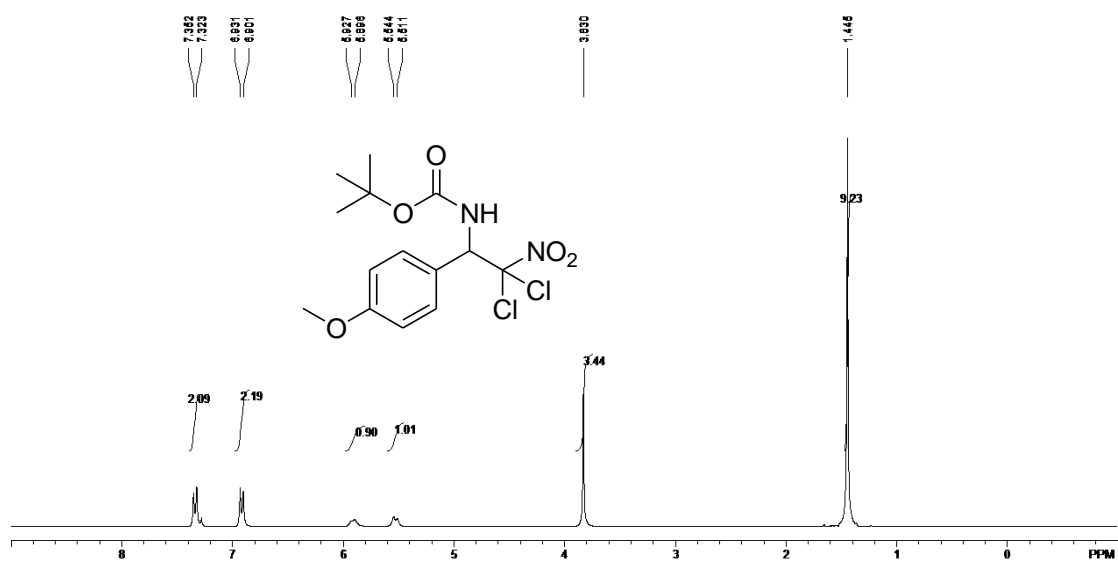

### $^1\text{H}$ NMR of **3i**

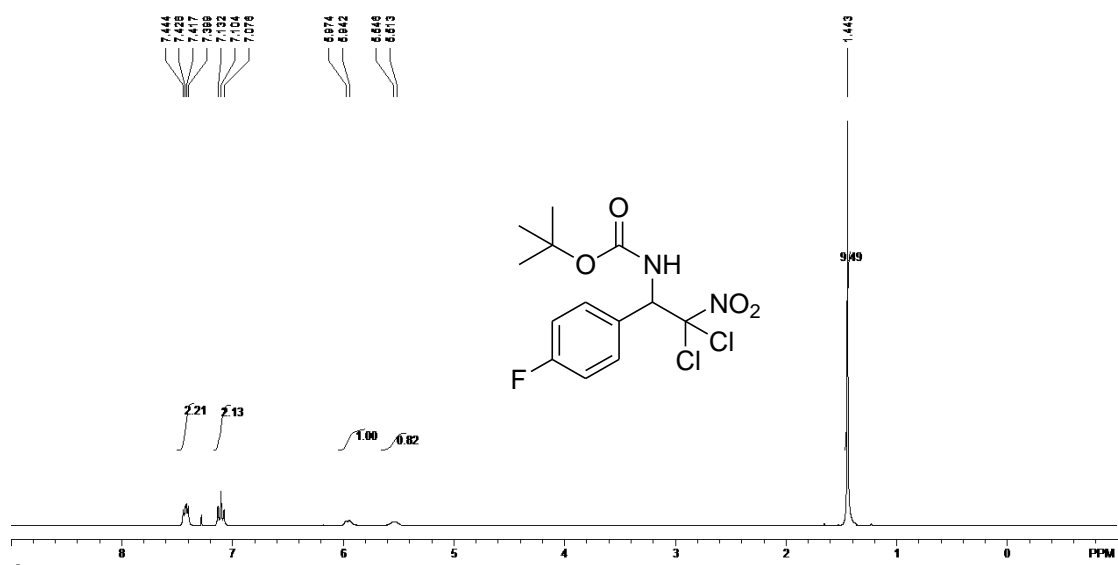

### $^1\text{H}$ NMR of **3j**

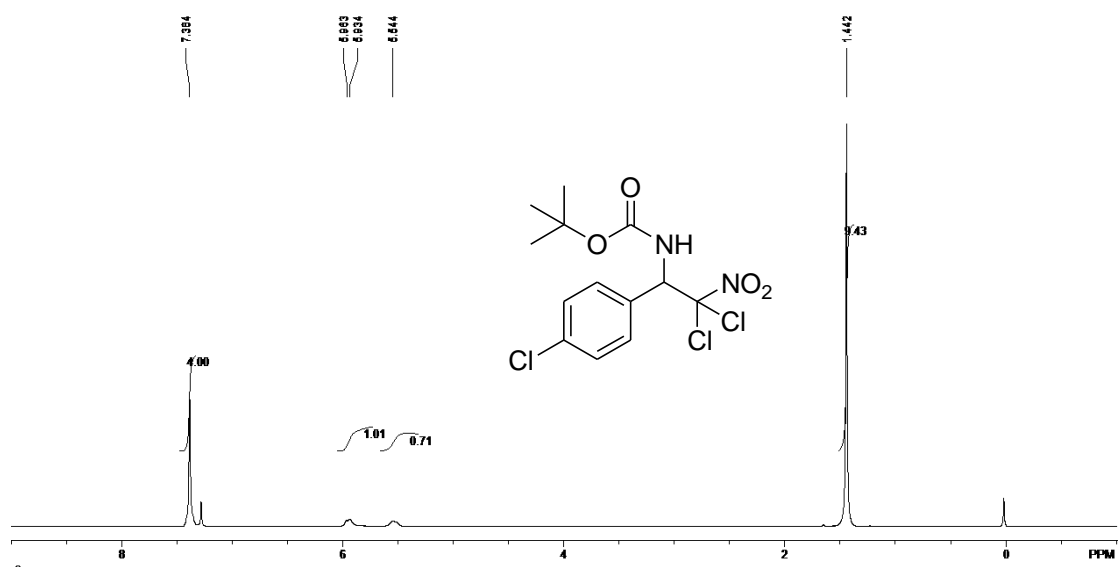

### $^1\text{H}$ NMR of **3k**

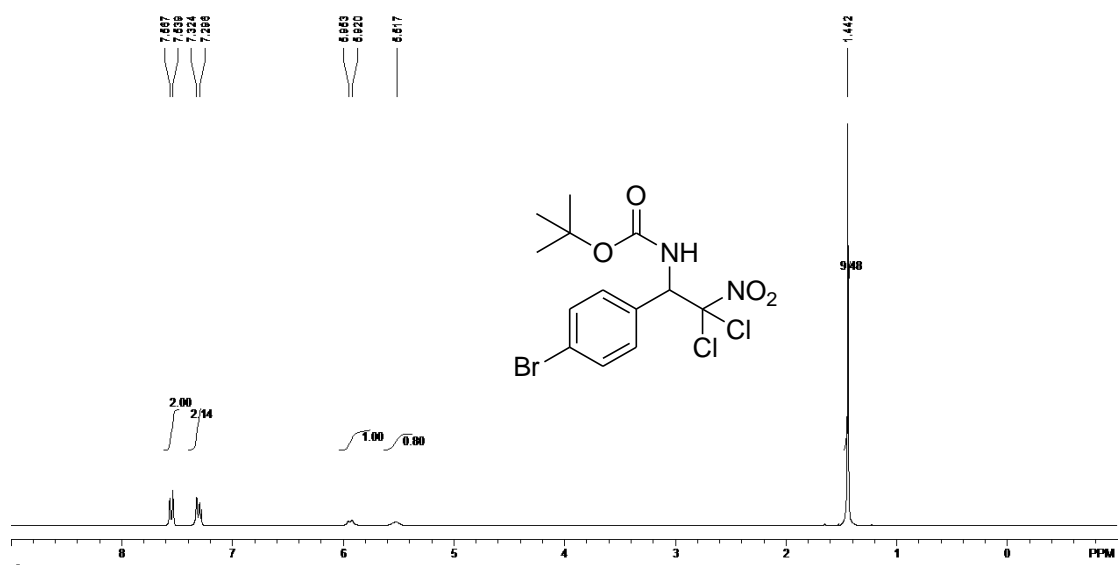

### $^1\text{H}$ NMR of **3l**

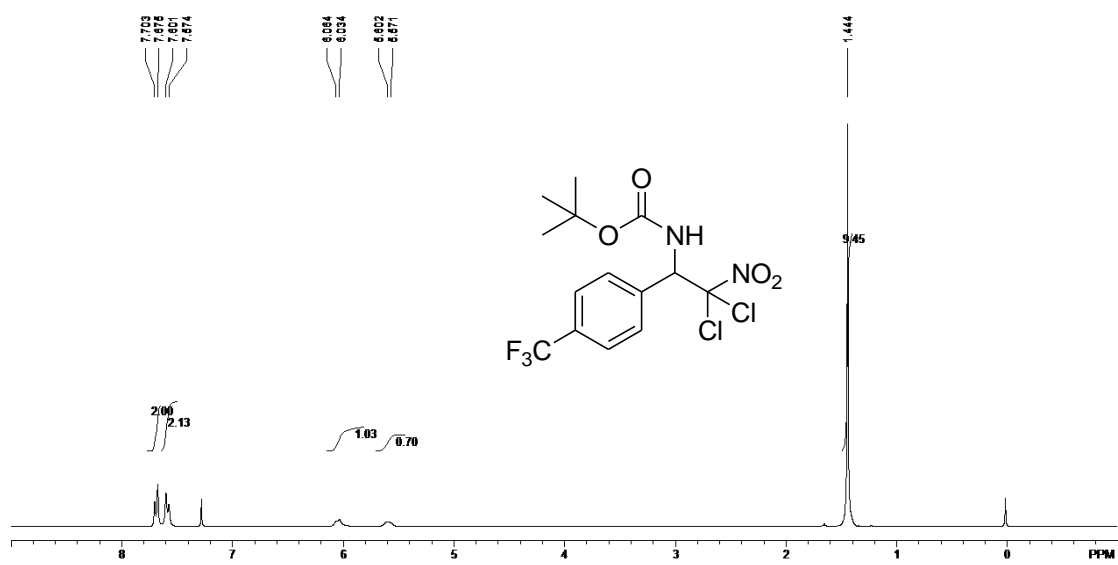

### $^1\text{H}$ NMR of **3m**

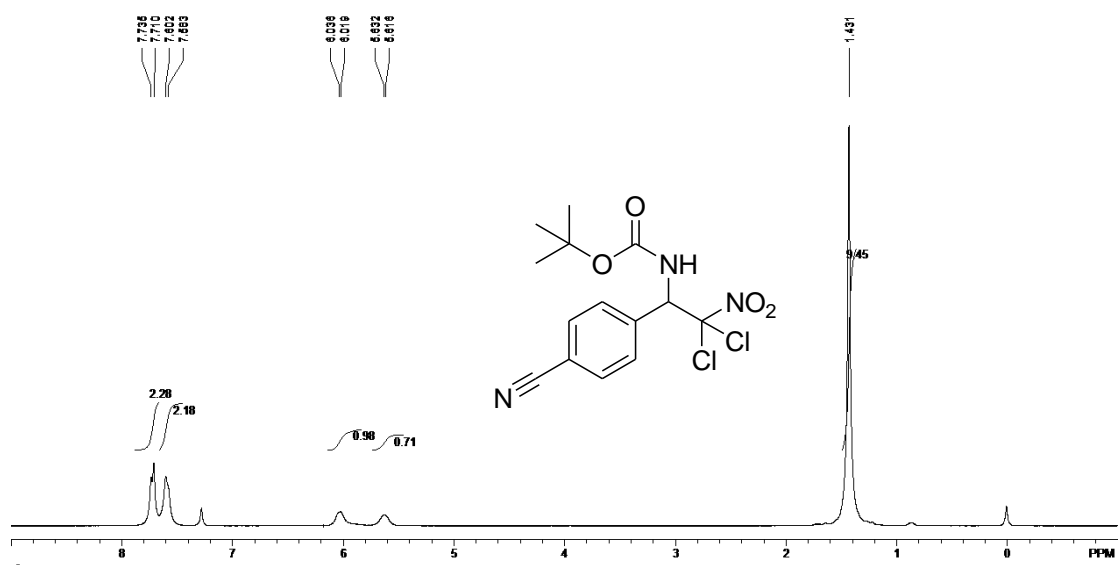

### $^1\text{H}$ NMR of **3n**

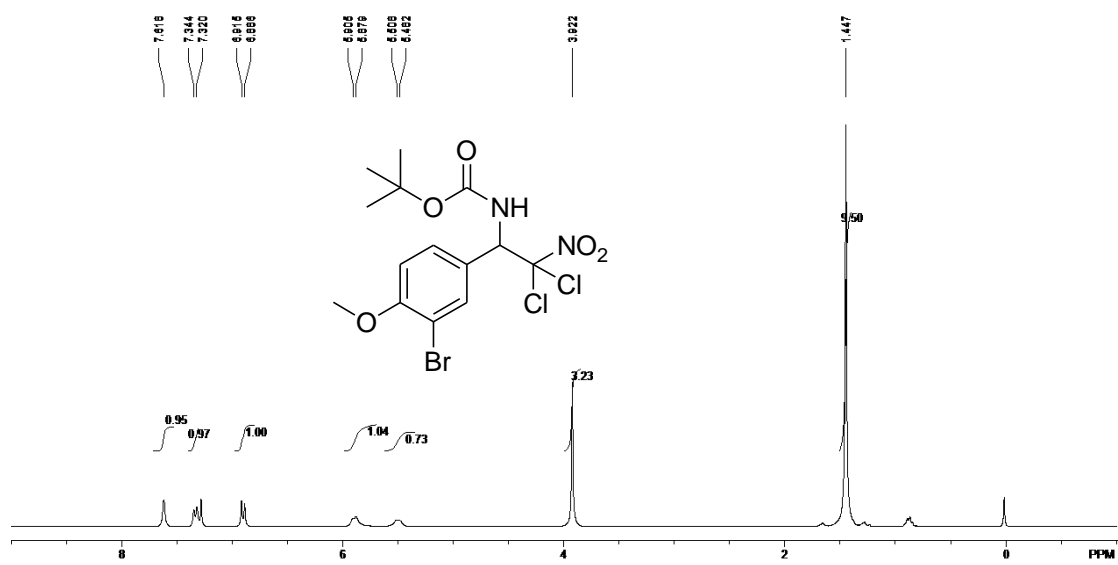

Supplement: c1ra00679g.pdf [file c1ra00679g.pdf]
